# Supplementary material for: COVID-19 in Pregnancy and Early Childhood (COPE): study protocol for a prospective, multicentre biobank, survey and database cohort study
Source: PubMed Central journal article supplement (PMC8441224; doi:10.1136/bmjopen-2021-049376), 2021-09-14
Supplement: bmjopen-2021-049376supp001.pdf [file bmjopen-2021-049376supp001.pdf]

**Supplementary file 2.** COPE Study sites (number of deliveries 2020)

1. BB Stockholm\* (4,177)
2. Borås\* (2,934)
3. Danderyd, Stockholm\* (6,342)
4. Eskilstuna (1,960)
5. Falun (2,996)
6. Göteborg\* (10,155)
7. Halmstad (2,034)
8. Helsingborg\* (3,411)
9. Kalmar (1,644)
10. Karolinska Huddinge, Stockholm (4,564)
11. Karolinska Solna, Stockholm\* (3,266)
12. Kristianstad (1,974)
13. Linköping\* (2,659)
14. Lund\* (3,547)
15. Malmö\* (5,176)
16. Norrköping\* (2,221)
17. NÄL, Trollhättan (3,284)
18. Skövde (2,561)
19. Sundsvall (1,642)
20. Södertälje\* (2,404)
21. Umeå\* (1,833)
22. Uppsala\* (4,159)
23. Varberg (2,050)
24. Västerås (2,845)
25. Ystad (1,244)
26. Örebro\* (3,406)
27. Östersund (1,271)

Number of deliveries 2020 according to the Swedish pregnancy register.

All centres participate in the questionnaire part of COPE.

\* Centre participates in the biobank part of COPE.
